# Supplementary material for: Methanol-derived high-performance Na3V2(PO4)3/C: from kilogram-scale synthesis to pouch cell safety detection
Source: Royal Society of Chemistry journal article supplement (doi:10.1039/d0nr04884d), 2020-01-01
Supplement: d0nr04884d1.pdf [file d0nr04884d1.pdf]

## Supplementary Information

### **Methanol derived high-performance Na<sub>3</sub>V<sub>2</sub>(PO<sub>4</sub>)<sub>3</sub>/C: From kilogram-Scale Synthesis to pouch cell Safety Detection**

Yuqiang Pi<sup>a</sup>, Zhiwei Gan<sup>a</sup>, Zheng Li<sup>b</sup>, Yushan Ruan<sup>a</sup>, Cunyuan Pei<sup>a</sup>, Hui Yu<sup>a</sup>, Kang Han<sup>a</sup>, Yaowen Ge<sup>b</sup>,  
Qinyou An<sup>a,c,\*</sup> and Liqiang Mai<sup>a,c,\*</sup>

<sup>a</sup> State Key Laboratory of Advanced Technology for Materials Synthesis and Processing, Wuhan  
University of Technology, Hubei, Wuhan 430070, China

<sup>b</sup> WUT Powerful Energy Co., Ltd., Hubei, Wuhan 430223, China

<sup>c</sup> Foshan Xianhu Laboratory of the Advanced Energy Science and Technology Guangdong Laboratory,  
Guangdong, Foshan 528200, China

\*Corresponding Authors

E-mail: mlq518@whut.edu.cn; anqinyou86@whut.edu.cn

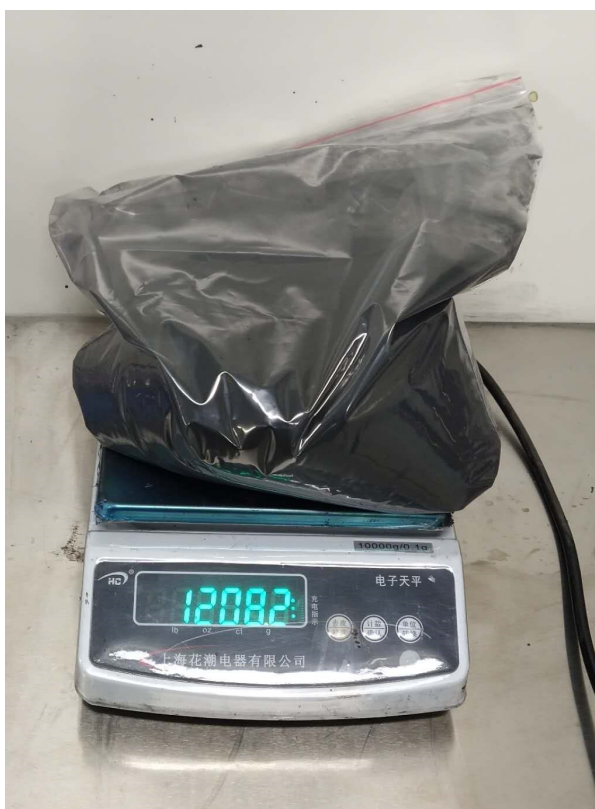

Fig. S1. Electronic images of M-NVP/C samples weighed

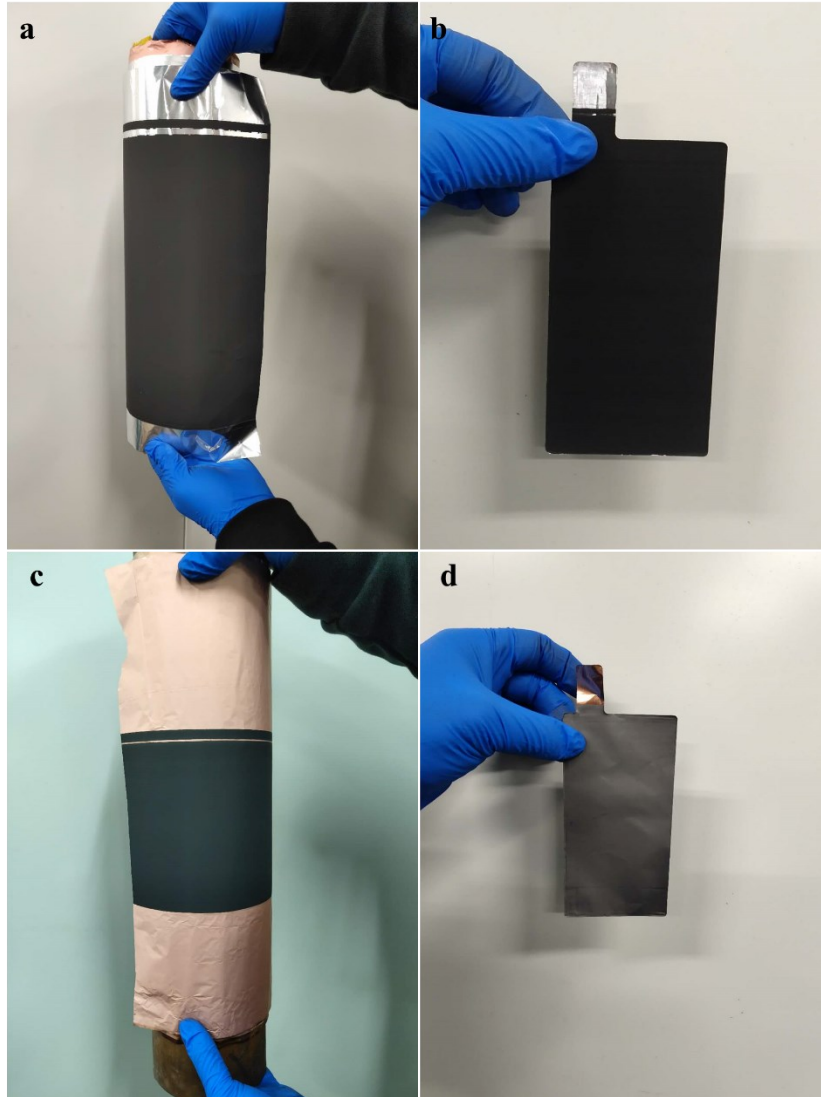

Fig. S2. a, b) Electronic images of the NVP cathode pole pieces; c, d) Electronic images of the HC anode pole pieces.

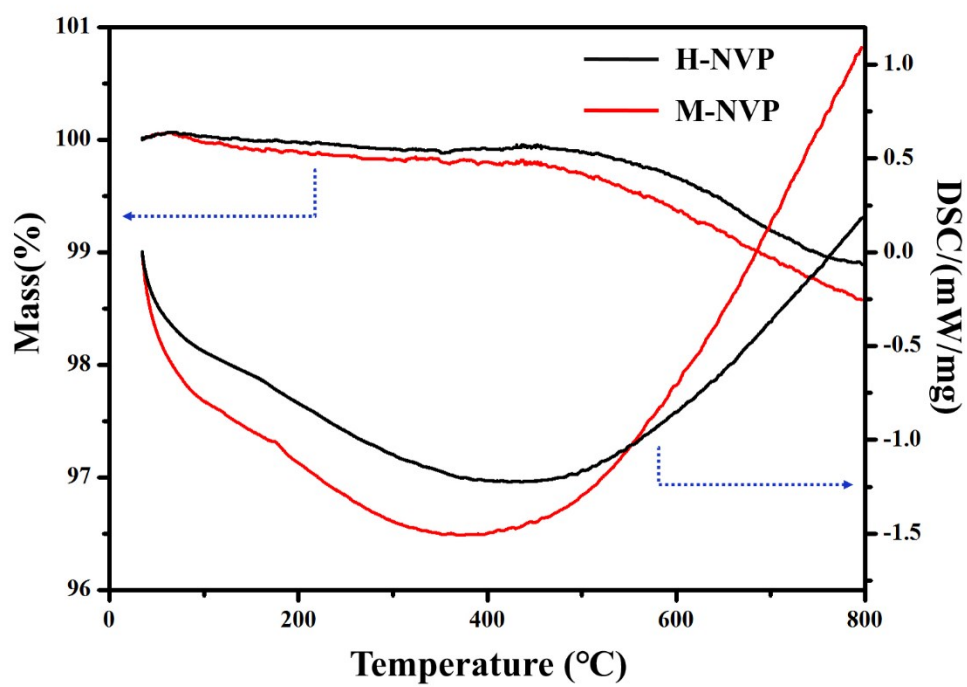

Fig. S3. The TG-DSC curve of M-NVP/C and H-NVP/C

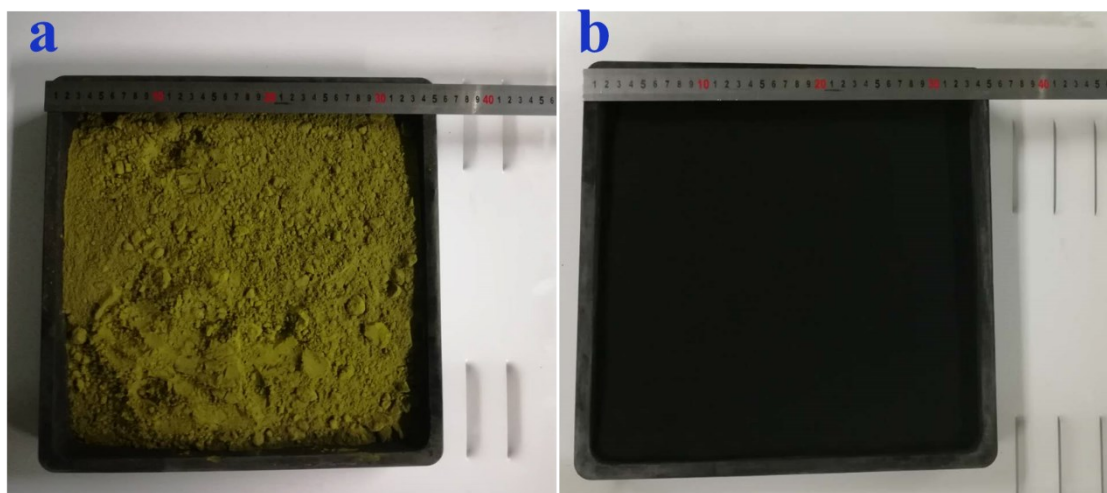

Fig. S4. a, b) Electronic images of the precursor and final product in the mullite sagger, respectively.

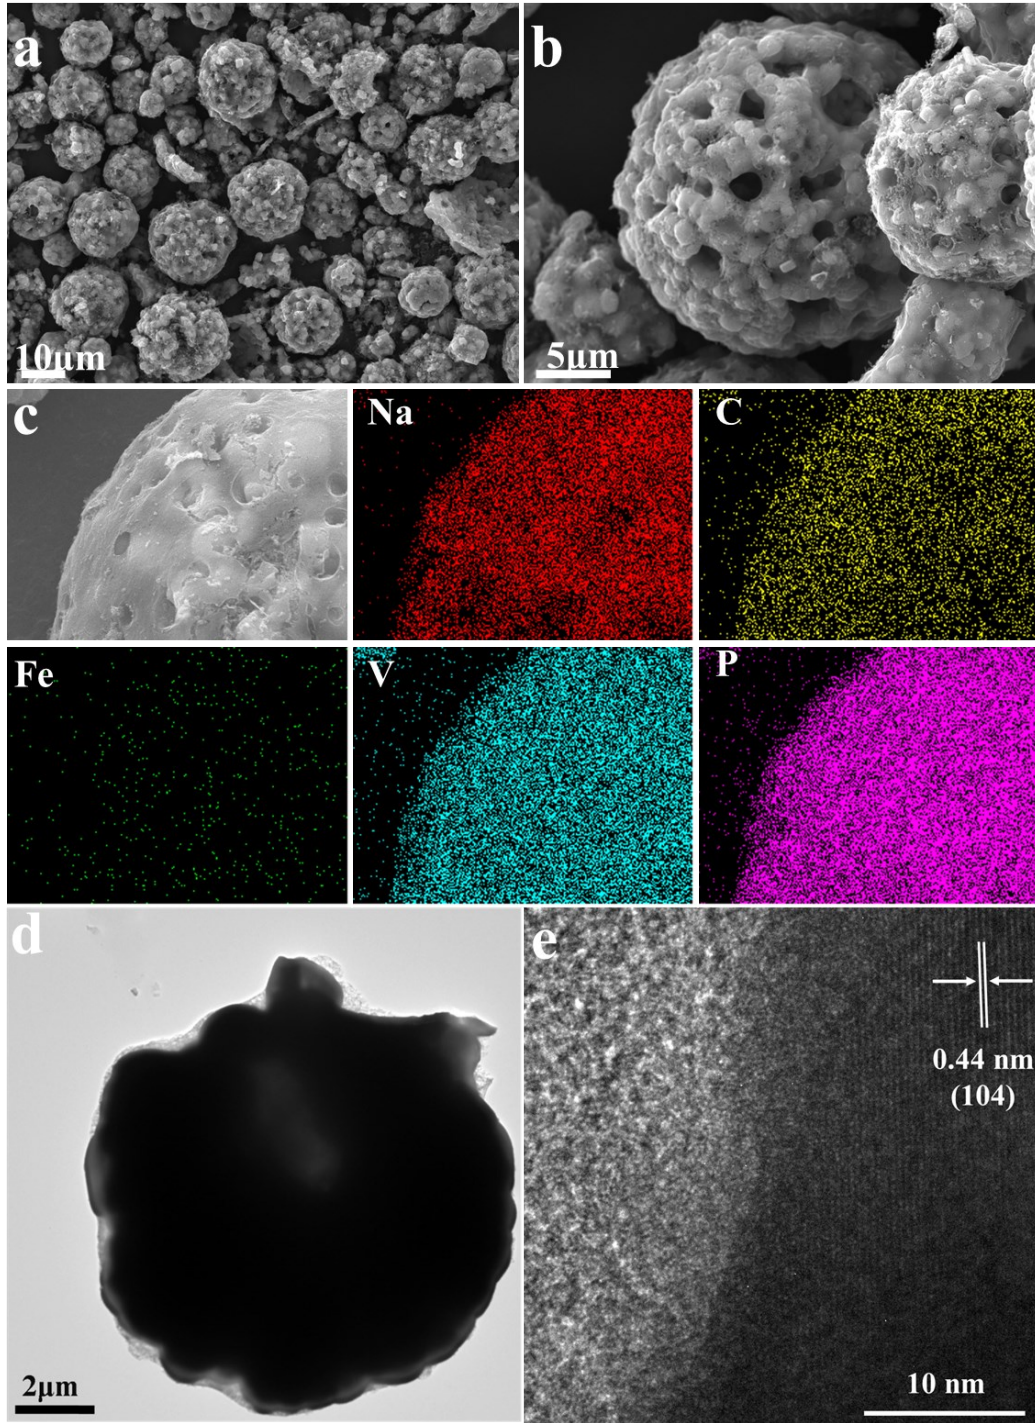

Fig. S5. a, b and c) SEM images of H-NVP/C; The accompanying diagram of (c) is the corresponding EDS elemental mapping; TEM (d) and HRTEM(f) images of H-NVP/C.

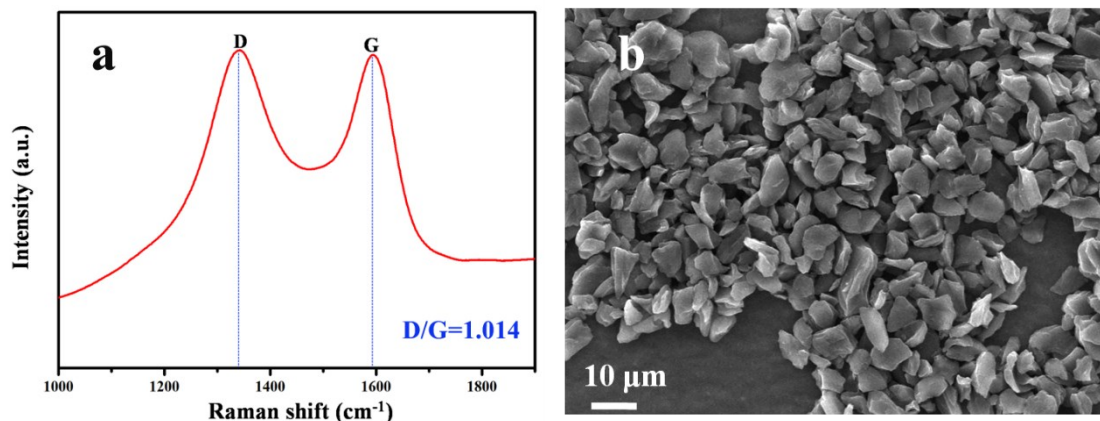

Fig. S6. a) Raman spectra of commercial hard carbon; a) SEM image of hard carbon

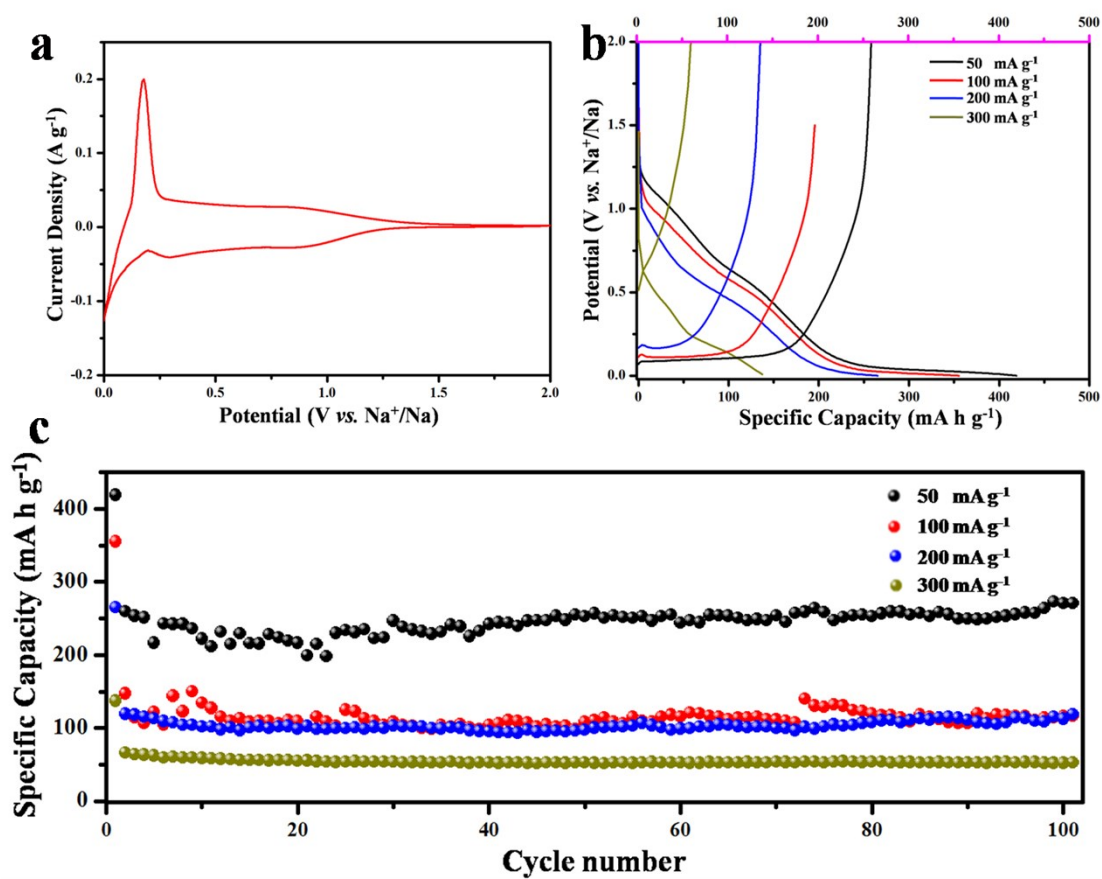

Fig. S7. a) The CV curves of hard carbon electrodes in the potential ranging from 0.01 to 2V versus Na/Na<sup>+</sup> at a scan rate of 0.1 mV s<sup>-1</sup>; b) Galvanostatic discharge curves of hard carbon at various current density from 50 mA g<sup>-1</sup> to 300 mA g<sup>-1</sup>; c) Cycling performance of hard carbon electrodes at various current density from 50 mA g<sup>-1</sup> to 300 mA g<sup>-1</sup>.
